# Supplementary material for: Soil Chemical Properties Strongly Influence Distributions of Six Kalidium Species in Northwest China
Source: MDPI journal article supplement (doi:10.3390/f13122178), 2022-12-19
Supplement: s1 [file Table S1.pdf › Table Supl/Table S1.pdf]

Table S1 Masses of 1000 seeds of the six *Kalidium* species

| Species                | Seed mass (g) |
|------------------------|---------------|
| <i>K. cuspidatum</i>   | 0.449±0.019   |
| <i>K. foliatum</i>     | 0.373±0.021   |
| <i>K. gracile</i>      | 0.351±0.036   |
| <i>K. sinicum</i>      | 0.291±0.015   |
| <i>K. caspicum</i>     | 0.39±0.017    |
| <i>K. schrenkianum</i> | 0.342±0.03    |
