# Supplementary material for: Soil Chemical Properties Strongly Influence Distributions of Six Kalidium Species in Northwest China
Source: MDPI journal article supplement (doi:10.3390/f13122178), 2022-12-19
Supplement: s1 [file Table S2.pdf › Table Supl/Table S2.pdf]

Table S2 Loading matrix of the Principle Components (PCs)

| <b>(a) <i>K. sinicum</i></b> |        |        |        | <b>(b) <i>K. cuspidatum</i></b> |        |        |        |
|------------------------------|--------|--------|--------|---------------------------------|--------|--------|--------|
|                              | PC1    | PC2    | PC3    |                                 | PC1    | PC2    | PC3    |
| bio5                         | 0.982  | 0.133  | -0.049 | bio1                            | 0.981  | 0.051  | 0.124  |
| bio9                         | 0.975  | 0.161  | -0.083 | bio5                            | 0.892  | -0.399 | 0.088  |
| bio1                         | 0.959  | -0.225 | -0.100 | alt                             | -0.869 | 0.387  | 0.071  |
| alt                          | -0.879 | 0.396  | -0.003 | bio6                            | 0.819  | 0.472  | 0.048  |
| bio6                         | 0.842  | -0.468 | -0.159 | bio2                            | -0.614 | 0.300  | 0.292  |
| bio12                        | 0.442  | 0.874  | -0.019 | bio12                           | 0.149  | 0.828  | -0.231 |
| bio14                        | 0.087  | 0.812  | -0.275 | bio14                           | -0.155 | 0.707  | 0.047  |
| bio2                         | -0.568 | -0.618 | -0.202 | bio9                            | 0.613  | 0.632  | 0.138  |
| pH                           | 0.378  | -0.428 | 0.118  | TS                              | -0.198 | -0.132 | 0.766  |
| TS                           | 0.254  | 0.100  | 0.906  | pH                              | 0.146  | 0.083  | 0.762  |

  

| <b>(c) <i>K. caspicum</i></b> |        |        |        | <b>(d) <i>K. gracile</i></b> |        |        |        |
|-------------------------------|--------|--------|--------|------------------------------|--------|--------|--------|
|                               | PC1    | PC2    | PC3    |                              | PC1    | PC2    | PC3    |
| bio1                          | 0.949  | 0.252  | -0.072 | bio1                         | 0.993  | -0.056 | 0.045  |
| bio6                          | 0.921  | 0.006  | -0.375 | bio6                         | 0.948  | 0.182  | 0.108  |
| bio5                          | 0.833  | 0.424  | 0.288  | bio5                         | 0.938  | -0.295 | -0.043 |
| bio2                          | -0.776 | -0.265 | 0.427  | bio9                         | 0.902  | 0.229  | 0.313  |
| alt                           | -0.705 | -0.425 | -0.496 | alt                          | -0.879 | 0.259  | 0.228  |
| bio14                         | -0.370 | 0.870  | 0.063  | bio12                        | -0.121 | 0.832  | -0.076 |
| bio12                         | -0.260 | 0.833  | -0.427 | pH                           | 0.182  | 0.622  | -0.263 |
| bio9                          | 0.635  | -0.734 | -0.015 | bio2                         | -0.132 | -0.598 | 0.523  |
| TS                            | -0.206 | 0.526  | 0.017  | bio14                        | 0.099  | 0.630  | 0.658  |
| pH                            | 0.097  | 0.097  | 0.833  | TS                           | 0.337  | 0.083  | -0.435 |

  

| <b>(e) <i>K. schrenkianum</i></b> |        |        |        | <b>(f) <i>K. foliatum</i></b> |        |        |        |
|-----------------------------------|--------|--------|--------|-------------------------------|--------|--------|--------|
|                                   | PC1    | PC2    | PC3    |                               | PC1    | PC2    | PC3    |
| bio5                              | 0.971  | 0.207  | 0.008  | bio9                          | 0.924  | -0.022 | -0.186 |
| alt                               | -0.968 | 0.095  | -0.111 | bio1                          | 0.894  | 0.397  | -0.011 |
| bio12                             | -0.872 | 0.110  | 0.382  | bio6                          | 0.889  | 0.212  | -0.097 |
| bio2                              | 0.870  | -0.351 | 0.092  | bio12                         | -0.889 | 0.147  | -0.016 |
| bio6                              | -0.010 | 0.814  | -0.431 | bio14                         | -0.705 | 0.422  | 0.006  |
| pH                                | 0.138  | 0.797  | 0.332  | alt                           | 0.227  | -0.926 | -0.146 |
| bio1                              | 0.700  | 0.707  | 0.091  | bio5                          | 0.593  | 0.713  | 0.138  |
| bio14                             | -0.583 | 0.671  | -0.053 | bio2                          | 0.379  | -0.696 | 0.124  |
| bio9                              | 0.089  | 0.352  | -0.924 | TS                            | 0.054  | 0.043  | 0.840  |
| TS                                | 0.104  | 0.530  | 0.719  | pH                            | -0.184 | 0.255  | -0.638 |

bio1, annual mean temperature; bio2, monthly mean diurnal temperature range; bio5, max temperature of the warmest month; bio6, min temperature of the coldest month; bio9, mean temperature of the driest quarter; bio12, annual average precipitation; bio14, precipitation of the driest month; alt, altitude; TS, total salt contents
